# Supplementary material
Source: PubMed Central journal article supplement (PMC6873107)

## Supporting Information:

**Supplementary Figure 1.- Comparison of chemical properties of peptides uniquely identified peptides by either of the two nanoLC-MS/MS systems.**

**A)** GRAVY-index of the uniquely identified peptide sequences, as calculated using GRAVY calculator (<http://www.gravy-calculator.de>), **B)** pI value of the respective peptide sequences, as calculated using “isoelectric point calculator” ( <http://isoelectric.org>), and **C)** peptide length as number of amino-acids per peptide.

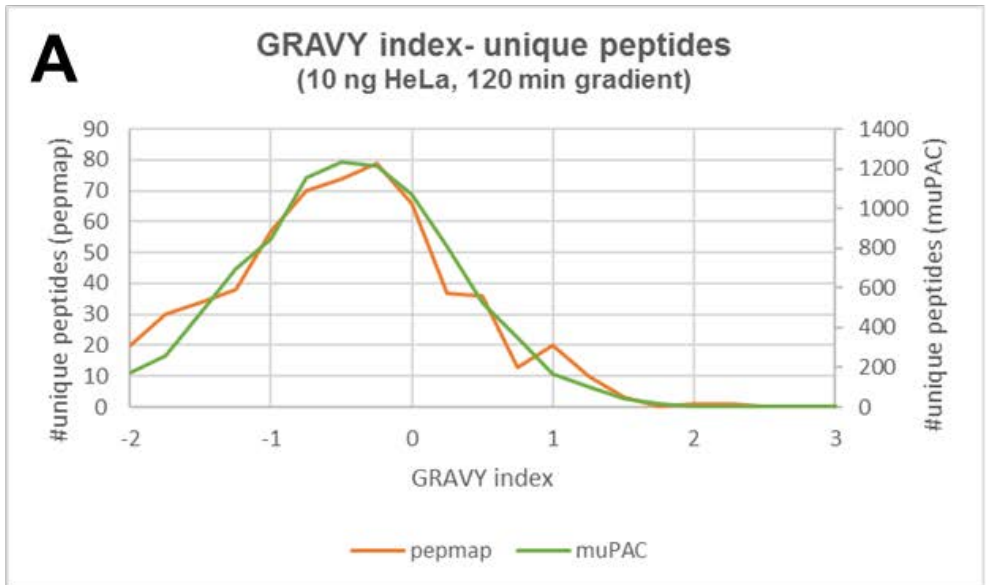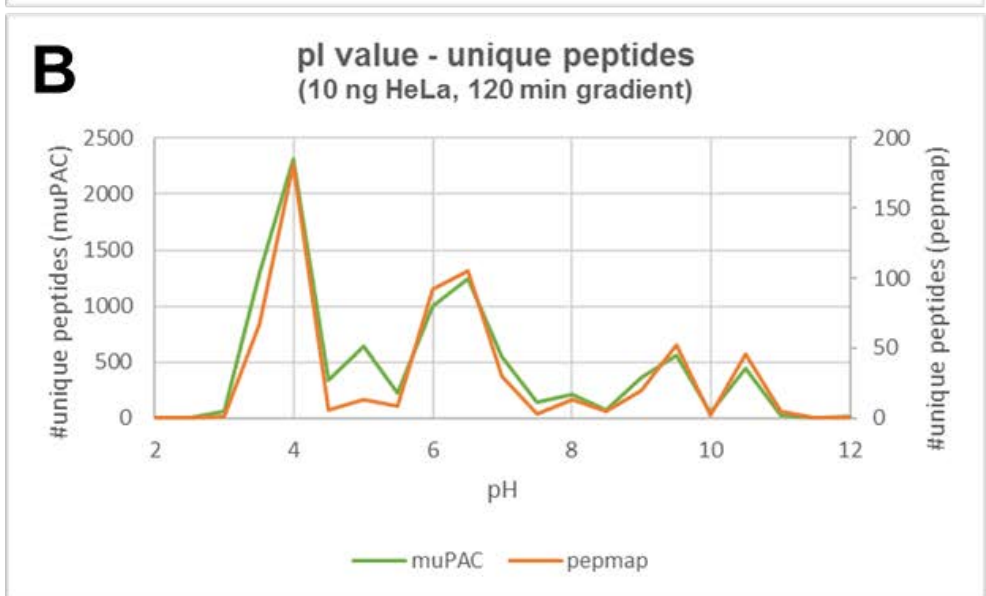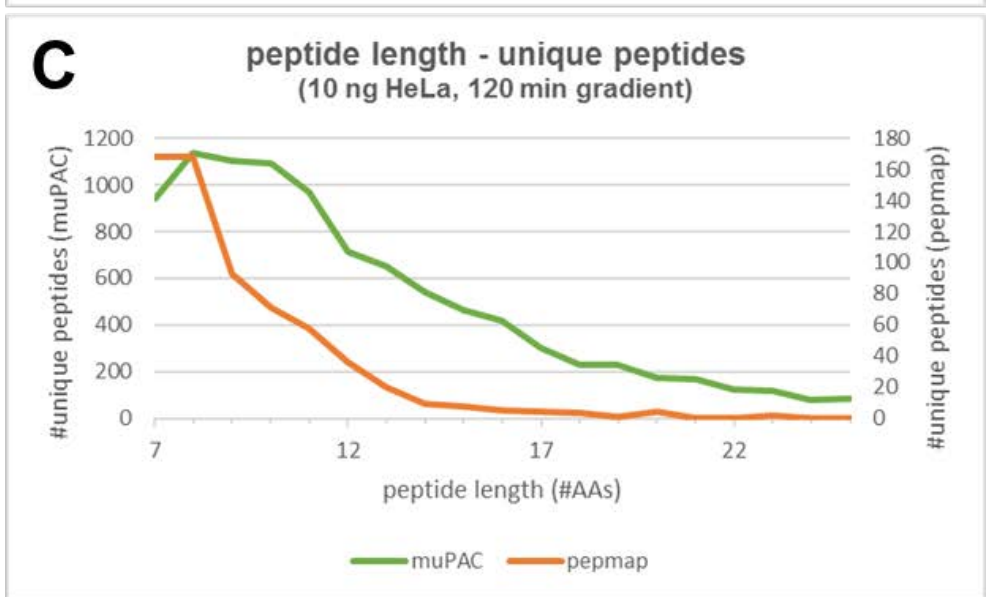

Supplement: ac9b02899_si_001.pdf [file ac9b02899_si_001.pdf]
